# Supplementary material for: A mixed methods study on evaluating the performance of a multi-strategy national health program to reduce maternal and child health disparities in Haryana, India
Source: Springer Nature journal article supplement (doi:10.1186/s12889-017-4706-9), 2017-09-11

1 Additional Figure 1. The conceptual Framework of NRHM.  
2

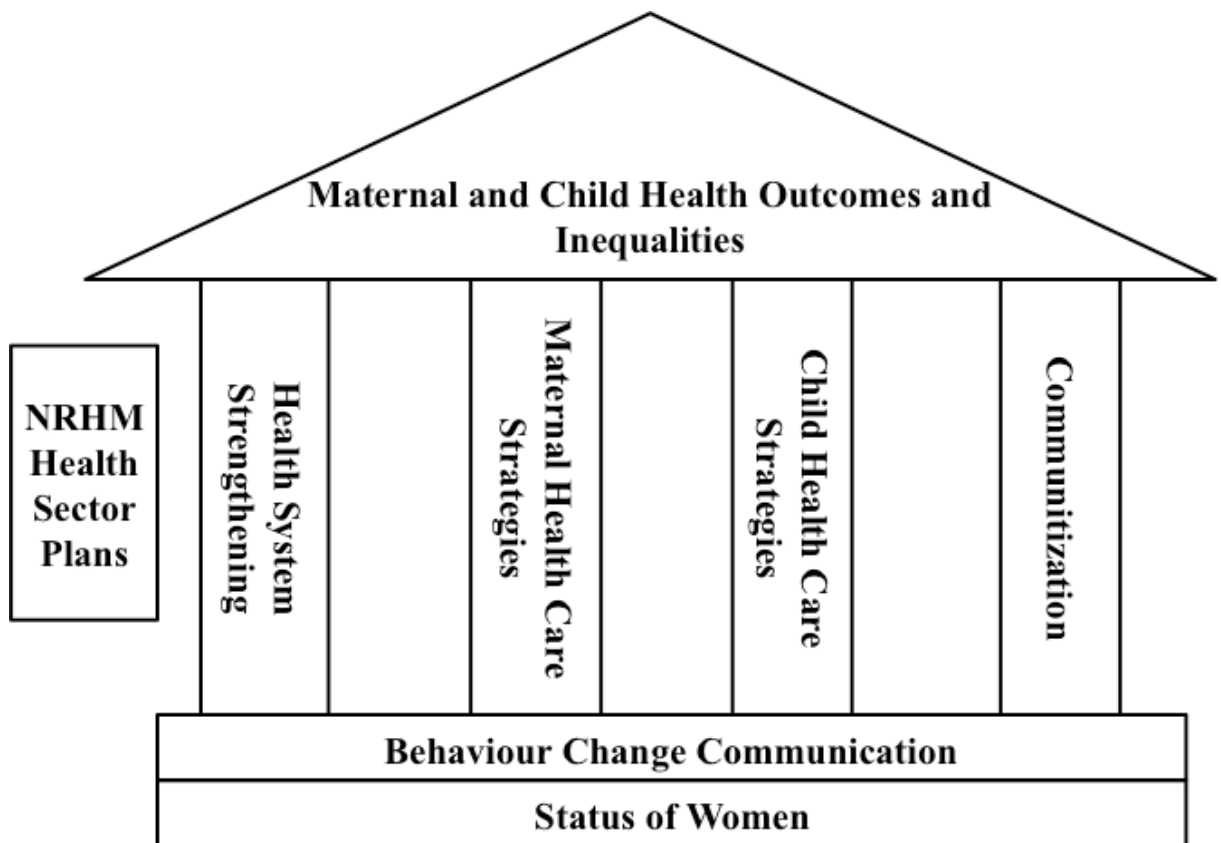

3  
4  
5  
6  
7  
8  
9  
10  
11  
12  
13  
14  
15  
16  
17  
18  
19  
20  
21  
22  
23  
24  
25  
26  
27  
28

29 **Additional Figure 2. Comparison of budget utilization rate of health system**  
30 **strengthening, communitization, maternal and child health care strategies components**  
31 **of National Rural Health Mission from 2007-08 to 2012-13.**

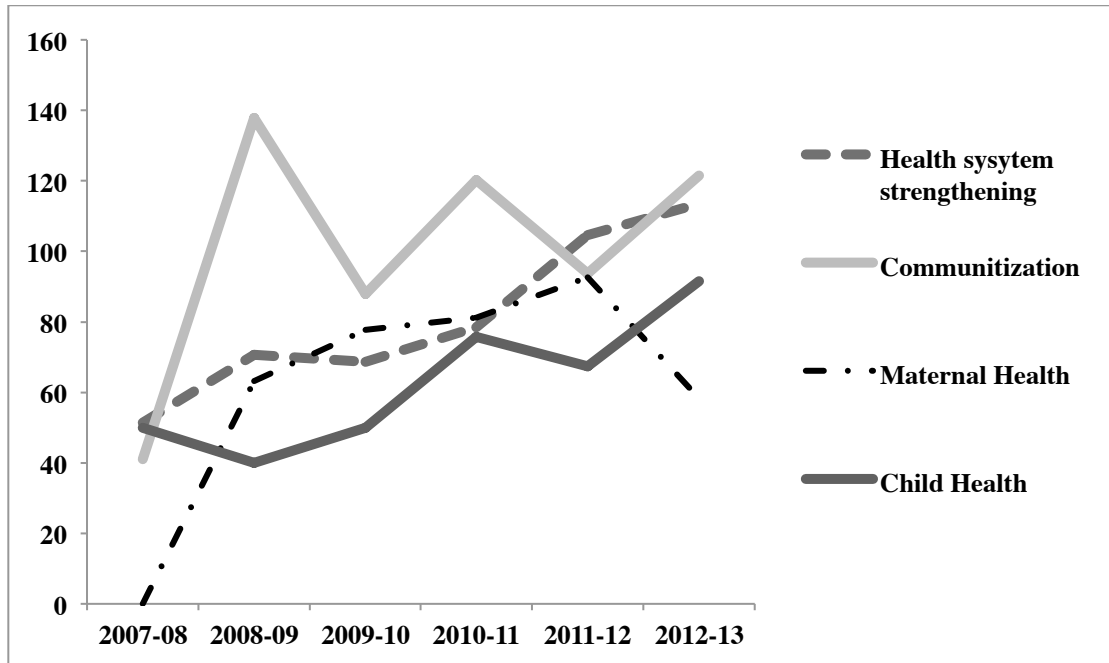

32

33

34

35

36

37

38

39

40

41

42

43

44

45

46

47

48

49

50

51

52

53

54

55

56

57 **Additional Figure 3. Trend of budget utilization rate of strategies under health system**  
 58 **strengthening component of National Rural Health Mission from 2007-08 to 2012-13.**  
 59

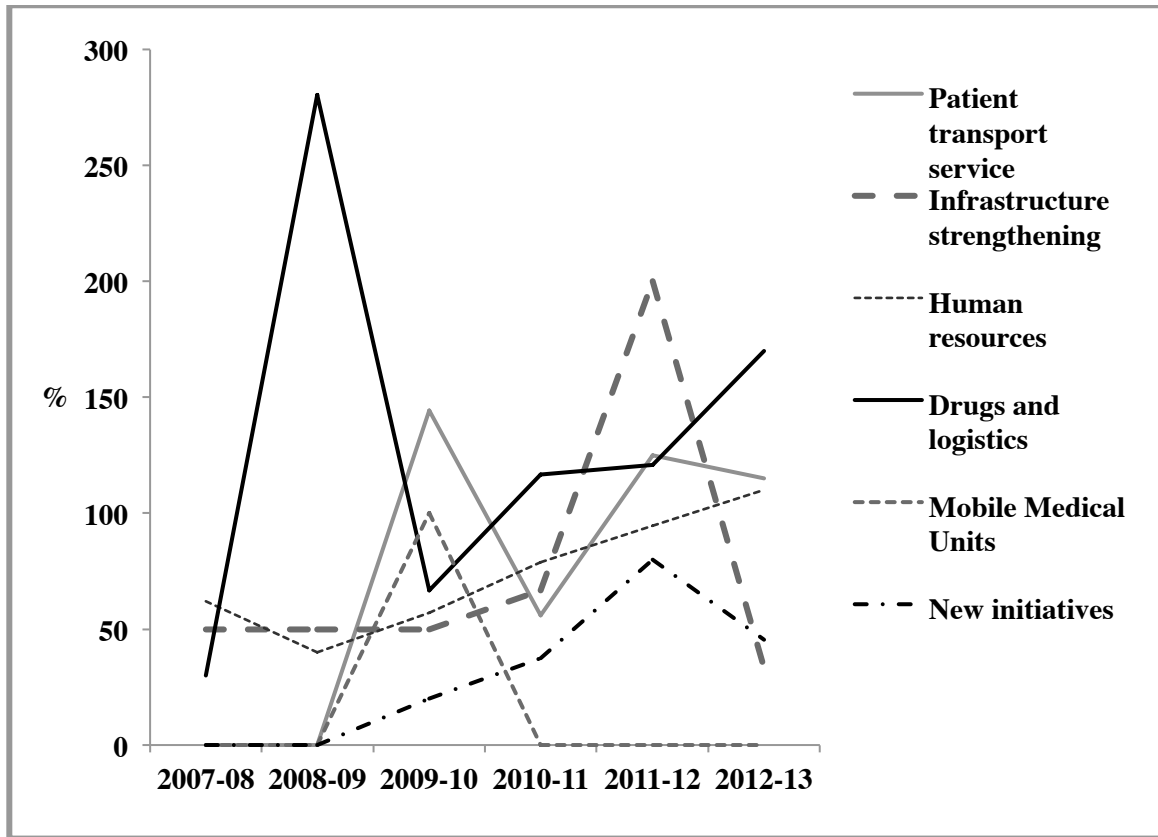

60

61

62 **Additional Figure 4. Trend of budget utilization rate of strategies under**

63 **communitization component of National Rural Health Mission from 2007-08 to 2012-13.**

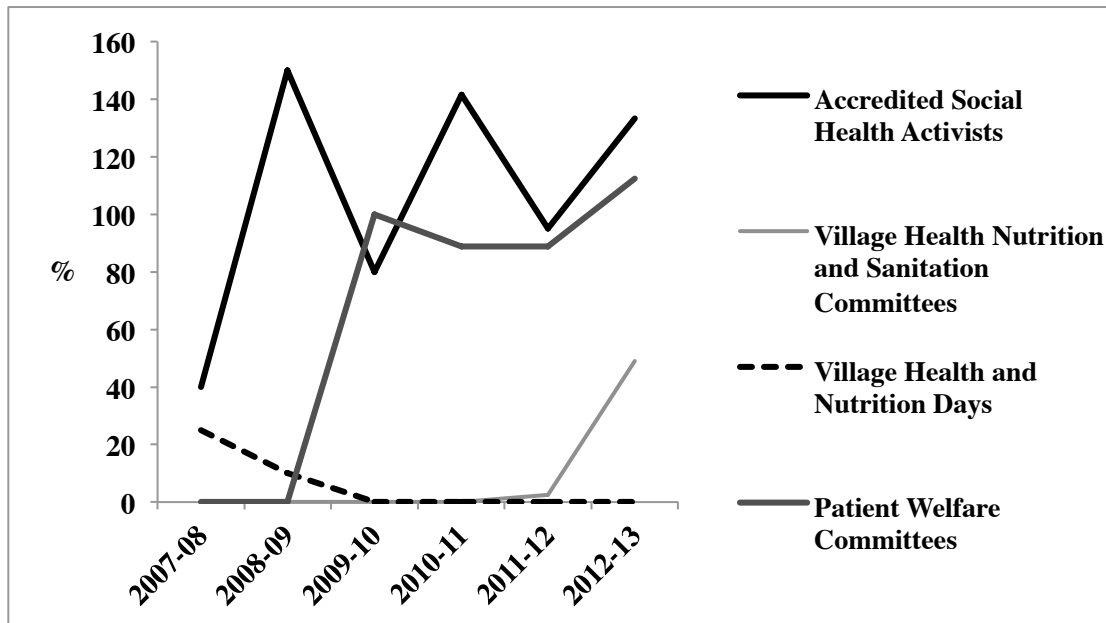

64

65

66

67

68

69

70

71

72

73

74

75

76

77

78

79

80

81

82

83

84

85

86

87

88

89

90

91 **Additional Figure 5. Trend of budget utilization rate of maternal health care strategies**  
92 **of National Rural Health Mission from 2007-08 to 2012-13.**

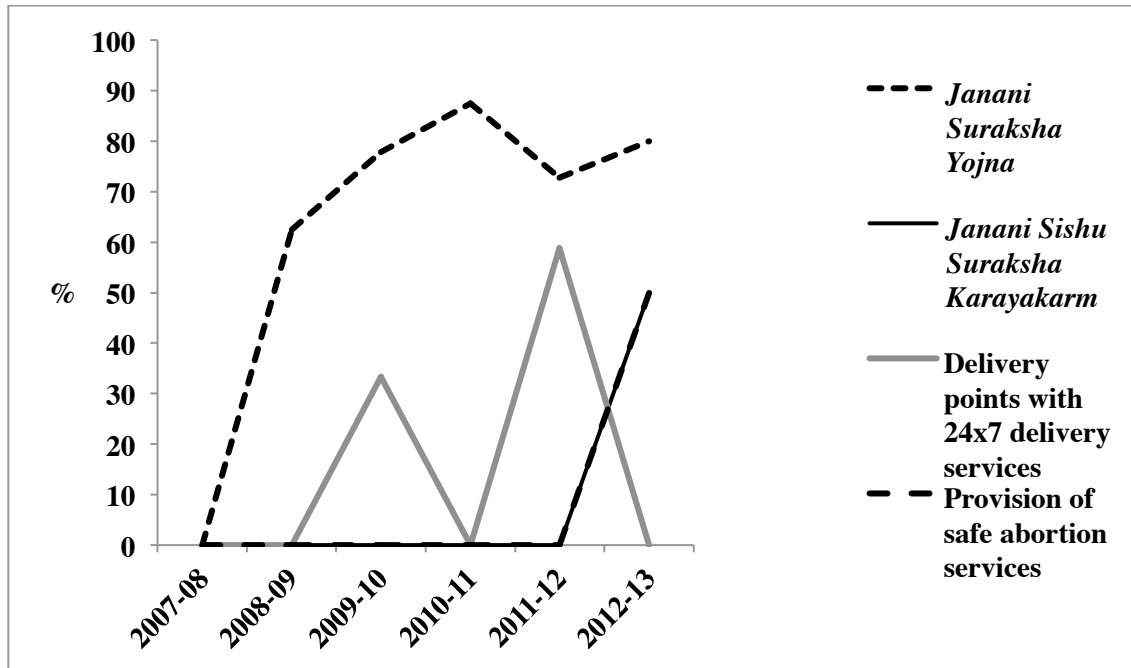

93  
94  
95  
96  
97  
98  
99  
100  
101  
102  
103  
104  
105  
106  
107  
108  
109  
110  
111  
112  
113  
114  
115  
116  
117  
118  
119

120 **Additional Figure 6. Trend of budget utilization rate of child health care strategies**  
 121 **component of NRHM from 2007-08 to 2012-13.**

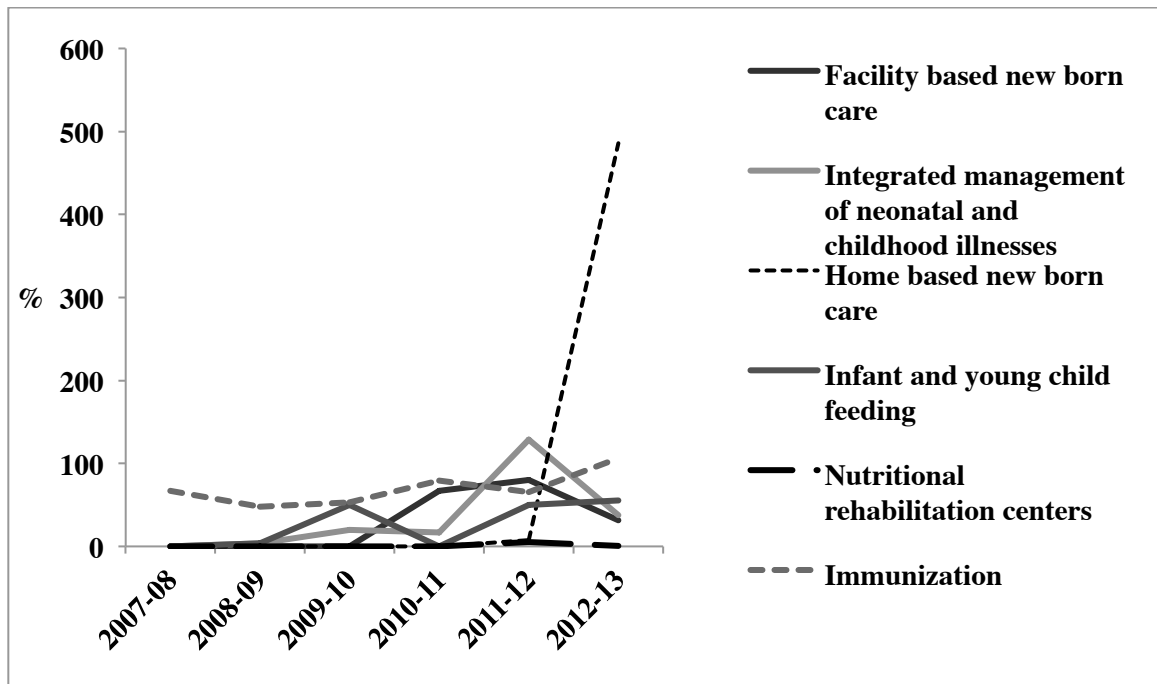

122

**Additional Figure 7. The pathway of change as derived from theory of change.**

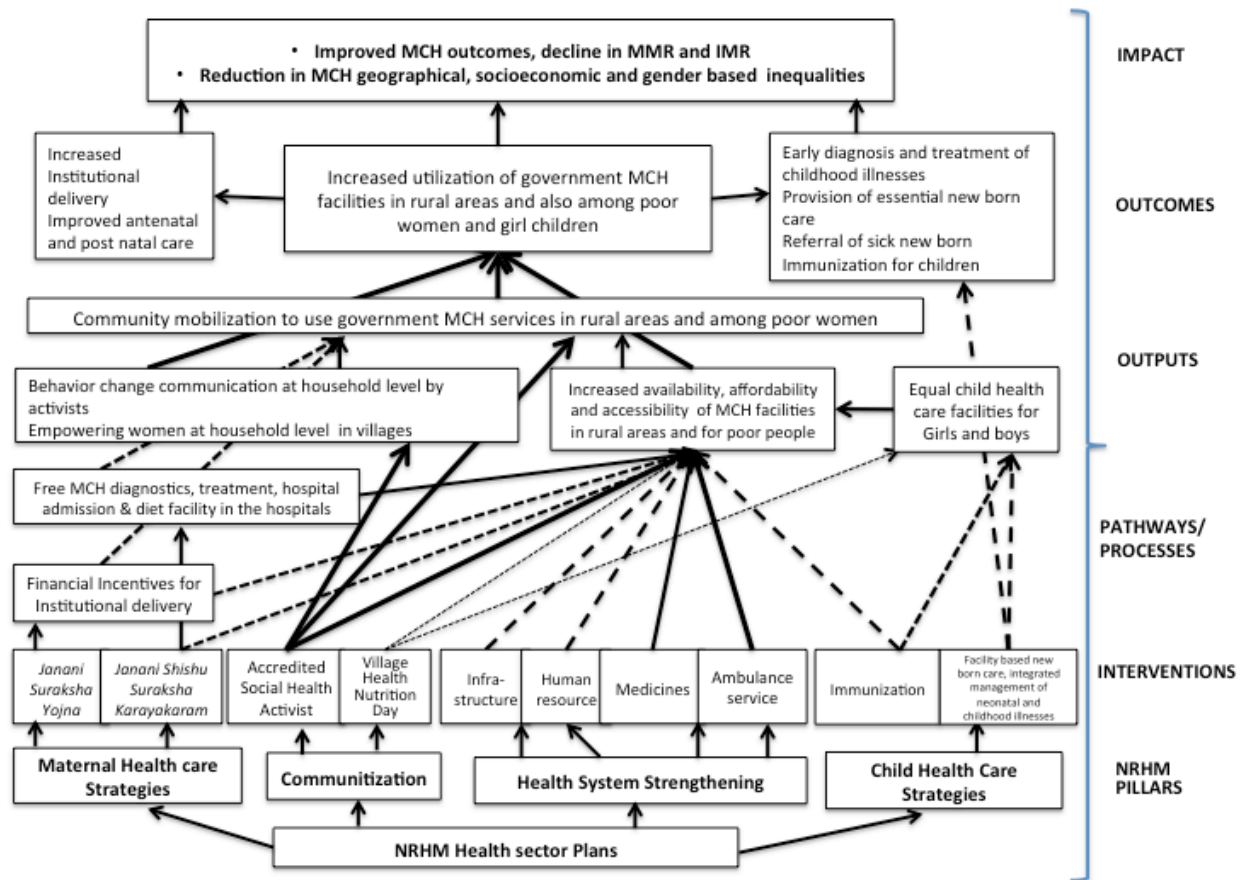

Supplement: MOESM1 [file 15036548]
