# Supplementary material for: A mixed methods study on evaluating the performance of a multi-strategy national health program to reduce maternal and child health disparities in Haryana, India
Source: PubMed Central journal article supplement (PMC5594476; doi:10.1186/s12889-017-4706-9), 2017-09-11
Supplement: 12889_2017_4706_MOESM4_ESM.pdf [file 12889_2017_4706_MOESM4_ESM.pdf]

**Additional Table 3. Status of maternal and child health indicators pre, during and post NRHM implementation in Haryana as per DLHS rounds 2, 3 and 4.**

| <b>Indicators</b>                                                       | <b>Pre NRHM</b>    | <b>During NRHM</b> | <b>Post NRHM</b>   | <b>P value</b> |
|-------------------------------------------------------------------------|--------------------|--------------------|--------------------|----------------|
|                                                                         | <b>(2002-2004)</b> | <b>(2007-2008)</b> | <b>(2012-2013)</b> |                |
| Maternal Mortality Ratio                                                | 1.86               | 1.53               | 1.21               | 0.13           |
| Infant Mortality Rate                                                   | 59                 | 55                 | 40                 | 0.09           |
| <b>Antenatal care (%): Pregnant women</b>                               |                    |                    |                    |                |
| Registered in the first trimester                                       | 13.7               | 55.1               | 82.1               | 0.00           |
| With three or more ANC                                                  | 43.1               | 51.9               | 74.5               | 0.00           |
| With full ANC check up                                                  | 11.8               | 13.3               | 21.8               | 0.06           |
| Who got at least one TT injection                                       | 83.5               | 86.1               | 93.6               | 0.04           |
| Two TT injections                                                       | 77.5               | 79.4               | 58.1               | 0.05           |
| Who had atleast 100 IFA tablets                                         | 16.5               | 29.0               | 29.5               | 0.00           |
| <b>Natal care (%)</b>                                                   |                    |                    |                    |                |
| Institutional delivery rate                                             | 35.7               | 46.9               | 76.9               | 0.00           |
| Safe deliveries (Deliveries assisted by skilled birth attendants)       | 43.9               | 53.4               | 91.0               | 0.00           |
| <b>Post natal care (%): Mothers who received post natal care within</b> |                    |                    |                    |                |
| 48 hours of delivery                                                    | NA                 | 48.8               | 67.2               | 0.01           |
| 2 weeks of delivery                                                     | 8.9                | 49.5               | 69                 | 0.07           |
| <b>Child Health (%): Children aged 12-23 months who received</b>        |                    |                    |                    |                |
| Full immunization                                                       | 59.1               | 59.6               | 52.1               | 0.28           |
| No vaccination                                                          | 11.8               | 1.9                | 5.9                | 0.00           |
| BCG vaccine                                                             | 83.5               | 86.5               | 84.2               | 0.96           |

|                                                                               |      |      |      |      |
|-------------------------------------------------------------------------------|------|------|------|------|
| 3 doses of DPT vaccine                                                        | 72.9 | 67.9 | 71.1 | 0.72 |
| 3 doses of polio vaccine                                                      | 73.6 | 69.0 | 72.7 | 0.83 |
| Measles vaccine                                                               | 65.4 | 69.0 | 70.0 | 0.53 |
| <b>Breast feeding practices (%)</b>                                           |      |      |      |      |
| Exclusively breast fed for atleast 6 months                                   | 33   | 5.7  | 27.4 | 0.00 |
| <b>Women awareness about</b>                                                  |      |      |      |      |
| Diarrhoea Managment                                                           | 49.8 | 79   | 81.7 | 0.00 |
| Danger signs of Acute respiratory infection                                   | 49.8 | 76.3 | 75.2 | 0.00 |
| <b>Percentage of women whose child suferred from<sup>¥</sup></b>              |      |      |      |      |
| Diarrhoea                                                                     | 18.1 | 16.0 | 4.0  | 0.00 |
| ARI                                                                           | 10.8 | 8.3  | 3.6  | 0.00 |
| <b>Childhood Diseases: Children with (illness reported in last two weeks)</b> |      |      |      |      |
| Diarrhoea who received ORS                                                    | 32.3 | 31.7 | 44.8 | 0.08 |
| Diarrhoea who sought advise/treatment                                         | 78.4 | 82.0 | 68.7 | 0.05 |
| Acute respiratory infection who sought advise/treatment                       | 78   | 88.1 | 85.5 | 0.5  |
