# Supplementary material for: A mixed methods study on evaluating the performance of a multi-strategy national health program to reduce maternal and child health disparities in Haryana, India
Source: PubMed Central journal article supplement (PMC5594476; doi:10.1186/s12889-017-4706-9), 2017-09-11
Supplement: 12889_2017_4706_MOESM5_ESM.pdf [file 12889_2017_4706_MOESM5_ESM.pdf]

**Additional Table 4. Geographical, socioeconomic and gender inequalities in maternal and child health indicators pre, during and post NRHM implementation (expressed as absolute difference in proportion of indicators).**

| Geographical Inequalities                               | Pre NRHM<br>(2002-2004) |       |      | During NRHM<br>(2007-2008) |       |       | Post NRHM<br>(2012-2013) |       |       | P value <sup>#</sup> |
|---------------------------------------------------------|-------------------------|-------|------|----------------------------|-------|-------|--------------------------|-------|-------|----------------------|
|                                                         | Rural                   | Urban | Diff | Rural                      | Urban | Diff  | Rural                    | Urban | Diff  |                      |
| <b>Maternal Health: Women who had (%)</b>               |                         |       |      |                            |       |       |                          |       |       |                      |
| Three or more ANC                                       | 40.8                    | 63.9  | 23*  | 47.2                       | 66.1  | 18.9* | 72.4                     | 77.8  | 5.4*  | 0.00                 |
| Full ANC check up                                       | 9.5                     | 17.9  | 8*   | 10.2                       | 22.6  | 12.4* | 19.2                     | 26.0  | 6.8*  | 0.00                 |
| Received two TT injections                              | 75                      | 84.3  | 9.3* | 76.9                       | 87    | 10.1* | 54.4                     | 65.2  | 10.8* | 0.02                 |
| Consumed IFA for at least 3 months                      | 15.9                    | 21.6  | 6*   | 28.1                       | 31.7  | 3.6*  | 27.6                     | 32.6  | 5*    | 0.08                 |
| Institutional delivery rate                             | 27.3                    | 56.4  | 29*  | 42.2                       | 61.4  | 19.2* | 74.3                     | 81.9  | 7.6*  | 0.00                 |
| PNC with in 2 weeks of delivery                         | 9.6                     | 6.8   | 2.8* | 46.5                       | 58.7  | 12.2* | 68.5                     | 70.0  | 1.5   | 0.00                 |
| <b>Child Health (%)</b>                                 |                         |       |      |                            |       |       |                          |       |       |                      |
| Children age 12-23 months who received Full vaccination | 56.7                    | 66.3  | 10*  | 55.9                       | 70.8  | 14.9* | 51.0                     | 54.5  | 3.5   | 0.00                 |

|                                                  |                                 |             |             |                     |                |             |                     |                |             |                |
|--------------------------------------------------|---------------------------------|-------------|-------------|---------------------|----------------|-------------|---------------------|----------------|-------------|----------------|
| Children with diarrhoea who received ORS         | 29                              | 40          | 11*         | 28.3                | 44.2           | 15.9*       | 45.6                | 43.4           | -2.2        | 0.01           |
| Infant Mortality Rate (per thousand live births) | 66                              | 47          | 19*         | 60                  | 44             | 16*         | 44                  | 32             | 12*         | 0.09           |
| <b>Socioeconomic Inequalities</b>                | <b>Standard of living index</b> |             |             | <b>Wealth Index</b> |                |             | <b>Wealth Index</b> |                |             | <b>P value</b> |
|                                                  | <b>Low</b>                      | <b>High</b> | <b>Diff</b> | <b>Lowest</b>       | <b>Highest</b> | <b>Diff</b> | <b>Lowest</b>       | <b>Highest</b> | <b>Diff</b> |                |
| <b>Maternal Health: Women who had (%)</b>        |                                 |             |             |                     |                |             |                     |                |             |                |
| Three or more ANC                                | 16.8                            | 17          | 0.2         | 16.3                | 72.4           | 46.5*       | 57                  | 80             | 23*         | 0.00           |
| Full ANC check up                                | 3.6                             | 20.1        | 16.5*       | 1.4                 | 23.5           | 20.1*       | 20                  | 36             | 16*         | 0.00           |
| Received two TT injections                       | 58.5                            | 88.5        | 30.3*       | 48.5                | 91.8           | 35.6*       | 77                  | 84             | 7*          | 0.00           |
| Consumed IFA for at least 3 months               | 8.5                             | 25.4        | 16.9*       | 2.2                 | 28.1           | 22.3*       | 30                  | 44             | 14*         | 0.00           |
| Institutional delivery rate                      | 11.8                            | 60          | 48.2*       | 14.8                | 70.9           | 52.5*       | 75                  | 88             | 13*         | 0.00           |
| PNC with in 2 weeks of delivery                  | 6.4                             | 8.6         | 2.2*        | 26.9                | 66.7           | 39.8*       | 55.4                | 72.1           | 16.7*       | 0.00           |
| <b>Child Health (%)</b>                          |                                 |             |             |                     |                |             |                     |                |             |                |
| Children (age 12-23 months) who received Full    | 30.6                            | 78.9        | 48.3*       | 28.5                | 74.4           | 44.4*       | 62                  | 76             | 14*         | 0.00           |

|                                          |               |               |             |               |               |             |               |               |             |                |
|------------------------------------------|---------------|---------------|-------------|---------------|---------------|-------------|---------------|---------------|-------------|----------------|
| vaccination                              |               |               |             |               |               |             |               |               |             |                |
| Children with diarrhoea who received ORS | 7.8           | 48.5          | 40.7*       | 10.3          | 44.7          | 34.4*       | 32            | 37            | 5           | 0.00           |
| <b>Gender Inequalities</b>               | <b>Male</b>   | <b>Female</b> | <b>Diff</b> | <b>Male</b>   | <b>Female</b> | <b>Diff</b> | <b>Male</b>   | <b>Female</b> | <b>Diff</b> | <b>P value</b> |
|                                          | <b>n=1221</b> | <b>n=993</b>  |             | <b>n=1178</b> | <b>n=947</b>  |             | <b>n=1142</b> | <b>n=896</b>  |             |                |
| Full Immunization                        | 61.8          | 56.1          | 5.7*        | 62.5          | 56.0          | 6.5*        | 51.9          | 52.5          | -0.6        | 0.00           |
| No Vaccination                           | 11.3          | 12.7          | -1.4        | 1.7           | 2.1           | -0.4*       | 6.5           | 6.8           | -0.3        | 0.00           |
| BCG vaccine                              | 84.3          | 82.4          | 1.9         | 87.8          | 84.9          | 2.9*        | 83.8          | 84.7          | -0.9        | 0.00           |
| 3 doses DPT vaccine                      | 75.6          | 70.7          | 4.9         | 71.7          | 65.8          | 5.9*        | 72.2          | 73.5          | -1.3        | 0.00           |
| 3 doses of OPV vaccine                   | 74.7          | 70.1          | 4.6*        | 70.2          | 64.7          | 4.6*        | 71.1          | 71.1          | 0           | 0.00           |
| Measles vaccine                          | 67.6          | 62.2          | 4.2*        | 70.9          | 66.7          | 5.4*        | 69.8          | 69.7          | 0.1         | 0.00           |

\*p<0.05; diff=Difference; # indicates statistically significant difference in the inequality across time periods
