# Supplementary material for: A mixed methods study on evaluating the performance of a multi-strategy national health program to reduce maternal and child health disparities in Haryana, India
Source: Springer Nature journal article supplement (doi:10.1186/s12889-017-4706-9), 2017-09-11
Supplement: MOESM2 [file 15036548]

**Additional Table 1. Year wise distribution of budget sanctioned, expenditure incurred (in million USD) and budget utilization rate (%) for NRHM's maternal and child health sector plans from the financial year 2007-08 to 2012-13.**

| NRHM Plans                                   | 2007-08        |                |                | 2008-09 |       |        | 2009-10 |      |        | 2010-11 |     |        | 2011-12 |      |        | 2012-13 |      |        |
|----------------------------------------------|----------------|----------------|----------------|---------|-------|--------|---------|------|--------|---------|-----|--------|---------|------|--------|---------|------|--------|
|                                              | S <sup>Φ</sup> | E <sup>α</sup> | % <sup>β</sup> | S       | E     | %      | S       | E    | %      | S       | E   | %      | S       | E    | %      | S       | E    | %      |
| <b>1. Health system strengthening</b>        | 3.50           | 1.80           | 51.4           | 3.54    | 2.50  | 70.6   | 5.90    | 4.05 | 68.6   | 9.3     | 7.3 | 78.5   | 12.9    | 13.5 | 104.6* | 13.3    | 15.1 | 113.5* |
| Patient transport service                    | 0              | 0              | 0              | 0       | 0     | 0      | 0.9     | 1.3  | 144.4* | 2.5     | 1.4 | 56     | 2.4     | 3    | 125    | 2       | 2.3  | 115*   |
| Infrastructure development and strengthening | 0.4            | 0.2            | 50             | 1       | 0.5   | 50     | 0.6     | 0.3  | 50     | 0.3     | 0.2 | 66.7   | 0.1     | 0.2  | 200*   | 0.3     | 0.1  | 33.3   |
| Human resources                              | 2.1            | 1.3            | 62             | 2       | 0.8   | 40     | 3.5     | 2    | 57.1   | 3.3     | 2.6 | 78.8   | 7.5     | 7.1  | 94.7   | 7.9     | 8.7  | 110*   |
| Drugs and logistics                          | 1              | 0.3            | 30             | 0.447   | 1.254 | 280.5* | 0.3     | 0.2  | 66.7   | 2.4     | 2.8 | 116.7* | 2.4     | 2.9  | 120.8* | 2       | 3.4  | 170*   |
| Mobile medical                               | 0              | 0              | 0              | 0       | 0     | 0      | 0.1     | 0.1  | 100    | 0.1     | 0   | 0      | 0.1     | 0    | 0      | 0.1     | 0    | 0      |

|                                                |        |      |      |      |       |         |      |       |       |     |     |        |      |       |       |      |       |        |  |
|------------------------------------------------|--------|------|------|------|-------|---------|------|-------|-------|-----|-----|--------|------|-------|-------|------|-------|--------|--|
| units                                          |        |      |      |      |       |         |      |       |       |     |     |        |      |       |       |      |       |        |  |
| New initiatives                                | 0      | 0    | 0    | 0    | 0     | 0       | 0.5  | 0.1   | 20    | 0.8 | 0.3 | 37.5   | 0.5  | 0.4   | 80    | 1.1  | 0.5   | 45.5   |  |
| <b>2.</b><br><b>Communitization</b>            | 0.56   | 0.23 | 41.1 | 0.58 | 0.80  | 137.93* | 1.90 | 1.67  | 87.89 | 2.1 | 2.5 | 120.2* | 1.90 | 1.78  | 93.7  | 3.07 | 3.73  | 121.5* |  |
| Accredited Social Health Activists             | 0.5    | 0.2  | 40   | 0.6  | 0.9   | 150     | 1    | 0.8   | 80    | 1.2 | 1.7 | 141.7* | 1    | 0.95  | 95    | 2.1  | 2.8   | 133.3* |  |
| Village health Nutrition and Sanitation Scheme | 0      | 0    | 0    | 0    | 0     | 0       | 0    | 0     | 0     | 0   | 0   | 0      | 0.04 | 0.001 | 2.5   | 0.1  | 0.049 | 49     |  |
| Village health and nutrition day               | 0.04   | 0.01 | 25   | 0.02 | 0.002 | 10      | 0    | 0.001 | 0     | 0   | 0   | 0      | 0    | 0     | 0     | 0    | 0     | 0      |  |
| Patient welfare committees                     | 0      | 0    | 0    | 0    | 0     | 0       | 0.9  | 0.9   | 100   | 0.9 | 0.8 | 88.9   | 0.9  | 0.8   | 88.9  | 0.8  | 0.9   | 112.5* |  |
| <b>3. Maternal Health Care Strategies</b>      | 0.0034 | 0    | 0    | 0.79 | 0.5   | 63.29   | 0.90 | 0.70  | 77.78 | 0.9 | 0.7 | 81.2   | 1.09 | 1.01  | 92.66 | 4.80 | 2.80  | 58.33  |  |

|                                             |       |      |    |       |      |       |      |      |       |          |     |       |      |           |       |           |           |       |
|---------------------------------------------|-------|------|----|-------|------|-------|------|------|-------|----------|-----|-------|------|-----------|-------|-----------|-----------|-------|
| <i>Janani Suraksha Yojna^</i>               | 0.003 | 0    | 0  | 0.8   | 0.5  | 62.50 | 0.9  | 0.7  | 77.8  | 0.8      | 0.7 | 87.5  | 1.1  | 0.8       | 72.7  | 1         | 0.8       | 80    |
| <i>Janani Shishu Suraksha Karayakaram#</i>  | 0     | 0    | 0  | 0     | 0    | 0.00  | 0    | 0    | 0     | 0        | 0   | 0     | 0    | 0.14      | 0     | 3.8       | 1.9       | 50    |
| Delivery points with 24x7 delivery services | 0     | 0    | 0  | 0.005 | 0    | 0.00  | 0.03 | 0.01 | 33.33 | 0        | 0   | 0     | 0.03 | 0.02      | 58.8  | 0         | 0.00<br>2 | 0     |
| Provision of safe abortion services         | 0     | 0    | 0  | 0     | 0    | 0.00  | 0    | 0    | 0.00  | 0.0<br>4 | 0   | 0     | 0    | 0.00<br>1 | 0     | 0.00<br>4 | 0.00<br>2 | 50    |
| <b>4. Child Health Care Strategies</b>      | 0.36  | 0.18 | 50 | 0.55  | 0.22 | 40    | 0.80 | 0.40 | 50    | 2.8      | 2.1 | 75.72 | 1.44 | 0.97      | 67.36 | 3.87      | 3.54      | 91.47 |
| Facility based newborn care                 | 0     | 0    | 0  | 0     | 0    | 0.00  | 0    | 0    | 0.00  | 0.3      | 0.2 | 66.7  | 0.5  | 0.4       | 80    | 0.48      | 0.15      | 31.3  |

|                                                           |       |     |       |      |       |       |       |      |       |      |      |      |       |       |      |       |       |      |
|-----------------------------------------------------------|-------|-----|-------|------|-------|-------|-------|------|-------|------|------|------|-------|-------|------|-------|-------|------|
| Integrated management of neonatal and childhood illnesses | 0.03  | 0   | 0     | 0.03 | 0.001 | 3.33  | 0.05  | 0.01 | 20.00 | 0.03 | 0.05 | 16.7 | 0.03  | 0.04  | 129  | 0.032 | 0.012 | 37.5 |
| Home based newborn care                                   | 0     | 0   | 0     | 0    | 0     | 0.00  | 0     | 0    | 0.00  | 0    | 0    | 0    | 0.13  | 0.01  | 7.7  | 0.007 | 0.034 | 486* |
| Infant and young child feeding                            | 0.001 | 0   | 0     | 0.05 | 0.002 | 4.00  | 0.04  | 0.02 | 50.00 | 0    | 0    | 0    | 0.02  | 0.01  | 50   | 0.009 | 0.005 | 55.6 |
| Nutritional rehabilitation centers                        | 0     | 0   | 0     | 0    | 0     | 0.00  | 0.003 | 0    | 0.00  | 0    | 0    | 0    | 0.004 | 0.002 | 5    | 0.017 | 0.001 | 0.6  |
| Immunization                                              | 0.3   | 0.2 | 66.67 | 0.46 | 0.22  | 47.83 | 0.7   | 0.37 | 52.86 | 2.4  | 1.9  | 79.2 | 0.75  | 0.49  | 65.3 | 3.1   | 3.3   | 106* |

$\alpha$  sanctioned;  $\beta$  Expenditure done;  $\gamma$  Budget Utilization Rate; \*Extra budget is received from state budget; ^Janani Suraksha Yojna- it was a financial incentive scheme for pregnant women to increase the institutional delivery rate:# Janani Shishu Suraksha Karayakaram- This scheme was launched to provide cashless delivery services for pregnant women including antenatal, natal and postnatal diagnostic, curative and transport services, and free treatment of sick infants in the public health facilities.
