# Supplementary material for: A mixed methods study on evaluating the performance of a multi-strategy national health program to reduce maternal and child health disparities in Haryana, India
Source: Springer Nature journal article supplement (doi:10.1186/s12889-017-4706-9), 2017-09-11
Supplement: MOESM3 [file 15036548]

**Additional Table 2. Status of Implementation on NRHM's maternal and child health sector plans in Haryana.**

| NRHM Plans                                               | Extent of Implementaion (Budget Utilization Rate) |                        |                       |                      |                    |
|----------------------------------------------------------|---------------------------------------------------|------------------------|-----------------------|----------------------|--------------------|
|                                                          | Full<br>( $\geq 100\%$ )                          | Partial                |                       |                      | Nil<br>( $< 1\%$ ) |
|                                                          |                                                   | High-level<br>(80-99%) | Mid-level<br>(20-79%) | Low-level<br>(1-19%) |                    |
| <b>1. Health System Strengthening</b>                    | ✓                                                 | -                      | -                     | -                    | -                  |
| Patient transport service/referral services              | ✓                                                 | -                      | -                     | -                    | -                  |
| Infrastructure development and strengthening             | -                                                 | -                      | ✓                     | -                    | -                  |
| Human resources                                          | ✓                                                 | -                      | -                     | -                    | -                  |
| Drugs and logistics                                      | ✓                                                 | -                      | -                     | -                    | -                  |
| Mobile medical units                                     | -                                                 | -                      | -                     | -                    | ✓                  |
| New Initiative                                           | -                                                 | -                      | ✓                     | -                    | -                  |
| <b>2. Communitization</b>                                | ✓                                                 | -                      | -                     | -                    | -                  |
| Accredited Female Health Activist                        | ✓                                                 | -                      | -                     | -                    | -                  |
| Village health and sanitation committees                 | -                                                 | -                      | ✓                     | -                    | -                  |
| Village health and nutrition days                        | -                                                 | -                      | -                     | -                    | ✓                  |
| Patient welfare committees                               | ✓                                                 | -                      | -                     | -                    | -                  |
| <b>3. Maternal Health Care Strategies</b>                | -                                                 | -                      | ✓                     | -                    | -                  |
| <i>Janani Suraksha Yojna</i>                             | -                                                 | ✓                      | -                     | -                    | -                  |
| <i>Janani Shishu Suraksha Karyakaram</i>                 | -                                                 | -                      | ✓                     | -                    | -                  |
| Delivery points with provision of 24x7 delivery services | -                                                 | -                      | -                     | -                    | ✓                  |
| Provision of safe MTP services                           | -                                                 | -                      | ✓                     | -                    | -                  |
| <b>4. Child Health Care Strategies</b>                   | -                                                 | ✓                      | -                     | -                    | -                  |

|                                              |   |   |   |   |   |
|----------------------------------------------|---|---|---|---|---|
| Facility based new born care                 | - | - | ✓ | - | - |
| Integrated management of childhood illnesses | - | - | ✓ | - | - |
| Home based new born care                     | ✓ | - | - | - | - |
| Infant and young child feeding               | - | - | ✓ | - | - |
| Nutrition Rehabilitation Centers             | - | - | - | - | ✓ |
| Immunization                                 | ✓ | - | - | - | - |
